# Supplementary material for: Understanding Period Poverty: Socio-Economic Inequalities in Menstrual Hygiene Management in Eight Low- and Middle-Income Countries
Source: PubMed Central journal article supplement (PMC7967348; doi:10.3390/ijerph18052571), 2021-03-04
Supplement: ijerph-18-02571-s001.pdf [file ijerph-18-02571-s001.pdf]

Supplementary Material

**Table S1.** Full set of Summary Statistics.

|                                                  |                                   | DRC<br>(Kinshasa) | Ethiopia | Ghana | Kenya | India<br>(Rajasthan) | Indonesia | Nigeria | Uganda |
|--------------------------------------------------|-----------------------------------|-------------------|----------|-------|-------|----------------------|-----------|---------|--------|
|                                                  |                                   | Mean              | Mean     | Mean  | Mean  | Mean                 | Mean      | Mean    | Mean   |
| Marital Status                                   | Never married                     | 0.561             | 0.415    | 0.377 | 0.387 | 0.235                | 0.29      | 0.372   | 0.315  |
|                                                  | Married/cohabitating              | 0.376             | 0.466    | 0.513 | 0.538 | 0.74                 | 0.666     | 0.576   | 0.537  |
|                                                  | Divorced/Widowed                  | 0.063             | 0.119    | 0.11  | 0.075 | 0.025                | 0.044     | 0.052   | 0.148  |
|                                                  | Total                             | =1                | =1       | =1    | =1    | =1                   | =1        | =1      | =1     |
| Education                                        | No schooling                      | 0.019             | 0.247    | 0.146 | 0.041 | 0.364                | 0.013     | 0.171   | 0.09   |
|                                                  | Primary or<br>Secondary schooling | 0.824             | 0.623    | 0.566 | 0.813 | 0.423                | 0.823     | 0.635   | 0.824  |
|                                                  | Tertiary education                | 0.158             | 0.13     | 0.288 | 0.146 | 0.213                | 0.164     | 0.194   | 0.086  |
|                                                  | Total                             | =1                | =1       | =1    | =1    | =1                   | =1        | =1      | =1     |
| Currently using family planning                  |                                   | 0.435             | 0.277    | 0.281 | 0.469 | 0.423                | 0.391     | 0.252   | 0.366  |
| Age                                              | Age 15-19                         | 0.249             | 0.298    | 0.211 | 0.246 | 0.214                | 0.173     | 0.237   | 0.25   |
|                                                  | Age 20-24                         | 0.206             | 0.189    | 0.192 | 0.18  | 0.186                | 0.136     | 0.157   | 0.202  |
|                                                  | Age 25-34                         | 0.304             | 0.291    | 0.312 | 0.314 | 0.324                | 0.266     | 0.305   | 0.289  |
|                                                  | Age 35-45                         | 0.241             | 0.221    | 0.285 | 0.26  | 0.275                | 0.425     | 0.301   | 0.26   |
|                                                  | Total                             | =1                | =1       | =1    | =1    | =1                   | =1        | =1      | =1     |
| Access to a flush toilet of sorts                |                                   | 0.551             | 0.102    | 0.273 | 0.194 | 0.515                | 0.889     | 0.471   | 0.063  |
| Self-report having access to place to wash hands |                                   | 0.495             | 0.123    | 0.157 | 0.41  | 0.66                 | 0.533     | -       | 0.258  |
| Residence                                        | Urban                             | -                 | 0.596    | 0.58  | 0.361 | 0.261                | 0.576     | 0.532   | 0.304  |
|                                                  | Rural                             | -                 | 0.404    | 0.42  | 0.639 | 0.739                | 0.424     | 0.468   | 0.696  |
|                                                  | Total                             |                   | =1       | =1    | =1    | =1                   | =1        | =1      | =1     |
| N                                                |                                   | 2102              | 4814     | 2861  | 4478  | 5018                 | 8122      | 8121    | 2736   |

**Table S2.** Decomposition of the CCI of sanitary pad access.

|                                    |              | Kinshasa  | Ethiopia  | Ghana      | Kenya     | Rajasthan | Indonesia | Nigeria   | Uganda   |
|------------------------------------|--------------|-----------|-----------|------------|-----------|-----------|-----------|-----------|----------|
| Quintile 1 (vs Quintile 5)         | Beta         | 0.12***   | 0.44***   | 0.14***    | 0.19***   | 0.28***   | 0.068***  | 0.37***   | 0.18***  |
|                                    | Contribution | -0.03***  | -0.19***  | -0.07***   | -0.08***  | -0.10***  | -0.02***  | -0.19***  | -0.07*** |
|                                    | %            | 22.30     | 30.3      | 37.46      | 38.7      | 21.52     | 21.06     | 31.97     | 23.28    |
| Quintile 2 (vs Quintile 5)         | Beta         | 0.11***   | 0.35***   | 0.12***    | 0.15***   | 0.23***   | 0.06***   | 0.21***   | 0.22***  |
|                                    | Contribution | -0.04***  | -0.077*** | -0.03***   | -0.04***  | -0.06***  | -0.02***  | -0.05***  | -0.05*** |
|                                    | %            | 24.90     | 12.20     | 16.87      | 21.51     | 12.97     | 18.46     | 8.08      | 16.36    |
| Quintile 3 (vs Quintile 5)         | Beta         | 0.04      | 0.31***   | 0.07**     | 0.11***   | 0.19***   | 0.04***   | 0.12***   | 0.24***  |
|                                    | Contribution | -0.003*** | -0.02***  | 0.000      | -0.004*** | -0.02***  | -0.003*** | -0.003*** | -0.02*** |
|                                    | %            | 1.85      | 2.77      | -0.26      | 1.82      | 3.43      | 3.6       | 0.53      | 5.72     |
| Quintile 4 (vs Quintile 5)         | Beta         | -0.05**   | 0.21***   | 0.04       | 0.04*     | 0.10***   | 0.02*     | 0.04***   | 0.07**   |
|                                    | Contribution | -0.01***  | 0.04***   | 0.01***    | 0.01***   | 0.02***   | 0.006***  | 0.01***   | 0.01***  |
|                                    | %            | 8.92      | -5.81     | -6.17      | -4.18     | -4.77     | -6.55     | -1.7      | -4.78    |
| Married/cohabiting (versus single) | Beta         | 0.03      | 0.14***   | 0.03*      | 0.06***   | 0.03      | 0.02      | 0.10***   | 0.12***  |
|                                    | Contribution | -0.001    | -0.05***  | -0.00379** | -0.01***  | -0.002    | 0.000     | -0.02***  | -0.03*** |
|                                    | %            | 0.46      | 8.47      | 2.1        | 5.06      | 0.41      | -0.46     | 3.87      | 9.16     |
| Divorced/Widowed                   | Beta         | 0.04      | 0.07***   | 0.04       | 0.05**    | 0.05      | -0.01     | 0.06***   | 0.12***  |

|                                                  |                |            |           |          |           |           |           |           |           |
|--------------------------------------------------|----------------|------------|-----------|----------|-----------|-----------|-----------|-----------|-----------|
| (versus single)                                  | Contribution   | -0.00      | 0.001***  | -0.000*  | 0.000     | -5.89**   | 3.90***   | -0.000*** | -0.002*   |
|                                                  | Contribution % | 0.08       | -0.23     | 0.22     | -0.09     | 0.01      | -0.04     | 0.07      | 0.72      |
| Primary/secondary (versus no-schooling)          | Beta           | -0.07      | -0.18***  | -0.09*** | -0.12***  | -0.15***  | -0.08***  | -0.17***  | -0.15***  |
|                                                  | Contribution   | 0.04***    | -0.09***  | 0.03***  | 0.09***   | -0.01***  | 0.05***   | 0.03***   | 0.04***   |
|                                                  | Contribution % | -29.02     | 13.54     | -16.24   | -44.03    | 3.27      | -51.73    | -4.97     | -12.12    |
| Tertiary education (versus no-schooling)         | Beta           | -0.12**    | -0.38***  | -0.18*** | -0.15***  | -0.36***  | -0.11***  | -0.28***  | -0.37***  |
|                                                  | Contribution   | -0.01***   | -0.02***  | -0.08*** | -0.02***  | -0.10***  | -0.01***  | -0.10***  | -0.02***  |
|                                                  | Contribution % | 9.65       | 2.97      | 46.63    | 11.68     | 22.96     | 13.49     | 17.54     | 6.95      |
| Currently using family planning                  | Beta           | 0.001      | -0.06***  | -0.02**  | 0.01      | -0.03**   | 0.01      | -0.01     | -0.00986  |
|                                                  | Contribution   | -3.29      | -5.31     | 0.000    | 0.001***  | -0.003*** | -0.000    | -0.001*** | -0.001*** |
|                                                  | Contribution % | 0.02       | 0.01      | -0.13    | -0.54     | 0.78      | 0.24      | 0.25      | 0.47      |
| Age 20-24 (vs Age 15-19)                         | Beta           | -0.06**    | -0.06***  | -0.01    | 0.05**    | 0.03      | 0.04**    | -0.04***  | -0.02     |
|                                                  | Contribution   | 0.000      | -0.002*** | 0.001*** | 0.001**   | 0.001*    | -0.000    | 0.001*    | -0.002*** |
|                                                  | Contribution % | -0.12      | 0.33      | -0.3     | -0.6      | -0.11     | 0.24      | -0.09     | 0.61      |
| Age 25-34 (versus Age 15-19)                     | Beta           | -0.003     | -0.01     | 0.03     | 0.07***   | 0.13***   | 0.061***  | -0.03**   | 0.09***   |
|                                                  | Contribution   | -0.00      | -0.001*** | 0.004*** | 0.005***  | 0.005*    | 0.000     | -0.001**  | 0.002     |
|                                                  | Contribution % | 0.08       | 0.13      | -2.07    | -2.41     | -1.16     | -0.18     | 0.25      | -0.56     |
| Age 35-45 versus Age 15-19)                      | Beta           | 0.0452*    | 0.046**   | 0.09***  | 0.15***   | 0.21***   | 0.11***   | 0.004     | 0.22***   |
|                                                  | Contribution   | -0.000102  | -0.005*** | 0.00     | -0.001    | 0.000     | 0.011***  | 0.0001*   | -0.01***  |
|                                                  | Contribution % | 0.07       | 0.79      | -1.34    | 0.42      | -0.02     | -11.85    | -0.02     | 4.48      |
| Access to a flush toilet of sorts                | Beta           | -0.00951   | 0.02      | 0.03*    | -0.005    | -0.02     | -0.003    | -0.03**   | -0.08     |
|                                                  | Contribution   | -0.0114*** | 0.000***  | 0.02***  | -0.002*** | -0.02***  | -0.004*** | -0.05***  | -0.003*** |
|                                                  | Contribution % | 7.57       | -0.08     | -12.58   | 0.97      | 5.47      | 3.86      | 7.84      | 0.87      |
| Self-report having access to place to wash hands | Beta           | 0.00283    | -0.08***  | 0.05***  | -0.03**   | -0.01     | -0.007    |           | -0.02     |
|                                                  | Contribution   | 0.00132*** | -0.004*** | 0.01***  | -0.01***  | -0.02***  | -0.005*** |           | -0.005*** |
|                                                  | Contribution % | -0.88      | 0.7       | -4.89    | 7.08      | 3.41      | 4.94      |           | 1.58      |
| Urban vs. (rural)                                | Beta           |            | -0.035**  | -0.06*** | -0.03**   | -0.08***  | -0.06***  | -0.06***  | -0.09***  |
|                                                  | Contribution   |            | -0.03***  | -0.09*** | -0.02***  | -0.06***  | -0.06***  | -0.10***  | -0.04***  |
|                                                  | Contribution % |            | 5.04      | 49.22    | 11.4      | 14.11     | 67.82     | 0.00      | 12.00     |

\*\*\* p<0.01, \*\* p<0.05, \* p<0.1

**Table S3.** Decomposition of the MHM conditions CCI

|                                          |                | Kinshasa  | Ethiopia  | Ghana     | Kenya     | Rajahstan | Indonesia | Nigeria   | Uganda    |
|------------------------------------------|----------------|-----------|-----------|-----------|-----------|-----------|-----------|-----------|-----------|
| Quintile 1 (vs Quintile 5)               | Beta           | 0.04**    | 0.07***   | 0.08**    | 0.20***   | 0.31***   | 0.21***   | 0.32***   | 0.40***   |
|                                          | Contribution   | -0.01***  | -0.03***  | -0.04***  | -0.08***  | -0.11***  | -0.061*** | -0.16***  | -0.16***  |
|                                          | Contribution % | 27.67     | 18.80     | 31.51     | 33.12     | 20.39     | 19.48     | 42.33     | 39.82     |
| Quintile 2 (vs Quintile 5)               | Beta           | 0.03**    | 0.08***   | 0.12***   | 0.13***   | 0.29***   | 0.11***   | 0.22***   | 0.32***   |
|                                          | Contribution   | -0.01***  | -0.02***  | -0.03***  | -0.04***  | -0.07***  | -0.03***  | -0.05***  | -0.07***  |
|                                          | Contribution % | 24.35     | 11.52     | 25.70     | 16.20     | 13.98     | 9.56      | 12.65     | 17.81     |
| Quintile 3 (vs Quintile 5)               | Beta           | 0.04***   | 0.06***   | 0.11***   | 0.05**    | 0.22***   | 0.04***   | 0.17***   | 0.32***   |
|                                          | Contribution   | -0.003*** | -0.004*** | 0.001     | -0.002*** | -0.02***  | -0.004*** | -0.005*** | -0.02***  |
|                                          | Contribution % | 8.79      | 2.27      | -0.60     | 0.74      | 3.52      | 1.26      | 1.22      | 5.67      |
| Quintile 4 (vs Quintile 5)               | Beta           | 0.04***   | 0.03***   | 0.13***   | 0.04*     | 0.09***   | 0.02*     | 0.12***   | 0.18***   |
|                                          | Contribution   | 0.01***   | 0.01***   | 0.04***   | 0.01***   | 0.02***   | 0.01***   | 0.03***   | 0.04***   |
|                                          | Contribution % | -27.07    | -3.27     | -28.66    | -3.22     | -3.85     | -2.28     | -6.99     | -9.003    |
| Married/cohabitant (versus single)       | Beta           | 0.002     | 0.01      | 0.06**    | -0.02     | 0.01      | 0.06***   | -0.05***  | -0.04*    |
|                                          | Contribution   | -5.60     | -0.005*** | -0.01**   | 0.003***  | -0.000    | 0.001     | 0.01***   | 0.01***   |
|                                          | Contribution % | 0.15      | 2.96      | 5.33      | -1.22     | 0.09      | -0.47     | -2.65     | -2.63     |
| Divorced/Widowed (versus single)         | Beta           | 0.02      | 0.002     | 0.07**    | -0.06**   | 0.02      | 0.08***   | -0.02     | -0.04     |
|                                          | Contribution   | -6.93     | 4.38***   | -0.001*   | -0.000    | -2.98**   | -0.000*** | 0.000***  | 0.001*    |
|                                          | Contribution % | 0.19      | -0.03     | 0.58      | 0.10      | 0.01      | 0.01      | -0.03     | -0.18     |
| Primary/secondary (versus no-schooling)  | Beta           | 0.06**    | -0.03***  | -0.02     | -0.04     | -0.01     | -0.19***  | 0.003     | 0.03      |
|                                          | Contribution   | -0.03***  | -0.01***  | 0.01***   | 0.03***   | -0.001*** | 0.11***   | -0.001*** | -0.001*** |
|                                          | Contribution % | 94.05     | 8.61      | -6.61     | -13.42    | 0.21      | -34.70    | 0.15      | 2.06      |
| Tertiary education (versus no-schooling) | Beta           | 0.05*     | -0.04***  | -0.05*    | -0.10**   | -0.07***  | -0.26***  | -0.06***  | -0.05     |
|                                          | Contribution   | 0.006***  | -0.002*** | -0.025*** | -0.01***  | -0.02***  | -0.03***  | -0.02***  | -0.003*** |
|                                          | Contribution % | -16.51    | 1.17      | 19.61     | 5.74      | 3.82      | 9.31      | 5.88      | 0.66      |
| Currently using family planning          | Beta           | 0.027***  | -0.01     | 0.01      | -0.01     | -0.01     | -0.01     | 0.00      | 0.01      |
|                                          | Contribution   | -0.001    | -1.27     | -7.36     | -0.001*** | -0.002*** | 0.000     | 0.00***   | 0.002***  |
|                                          | Contribution % | 1.81      | 0.01      | 0.06      | 0.56      | 0.35      | -0.06     | -0.09     | -0.46     |
| Age 20-24 (vs Age 15-19)                 | Beta           | -0.03**   | -0.001    | -0.01     | -0.001    | -0.03     | -0.04**   | 0.03*     | 0.003     |
|                                          | Contribution   | 7.76      | -3.23***  | 0.000***  | -3.43**   | -0.000*   | 0.000     | -0.000*   | 0.000***  |
|                                          | Contribution % | -0.21     | 0.02      | -0.26     | 0.01      | 0.09      | -0.08     | 0.09      | -0.064    |
| Age 25-34 (versus Age 15-19)             | Beta           | -0.03**   | -0.001    | -0.11***  | 0.02      | -0.03     | -0.03     | 0.04***   | 0.03      |
|                                          | Contribution   | -0.001    | -8.52***  | -0.01***  | 0.001***  | -0.001*   | -7.02     | 0.002***  | 0.000     |
|                                          | Contribution % | 2.75      | 0.05      | 9.17      | -0.63     | 0.21      | 0.02      | -0.51     | -0.12     |

|                                                           |                   |           |           |          |          |          |           |          |           |
|-----------------------------------------------------------|-------------------|-----------|-----------|----------|----------|----------|-----------|----------|-----------|
| Age 35-45<br>versus Age<br>15-19)                         | Beta              | -0.03**   | 0.003     | -0.08*** | -0.01    | -0.03    | -0.03     | 0.04**   | 0.07**    |
|                                                           | Contribution      | 6.64      | -0.000*** | -0.002   | 4.94     | -1.41    | -0.003*** | 0.001*   | -0.004*** |
|                                                           | Contribution<br>% | -0.18     | 0.22      | 1.78     | -0.02    | 0.003    | 0.97      | -0.33    | 1.07      |
| Access to a<br>flush toilet of<br>sorts                   | Beta              | -0.00746  | -0.08***  | -0.04*   | -0.11*** | -0.20*** | -0.27***  | -0.11*** | -0.13***  |
|                                                           | Contribution      | -0.01***  | -0.002*** | -0.03*** | -0.04*** | -0.24*** | -0.31***  | -0.20*** | -0.005*** |
|                                                           | Contribution<br>% | 24.12     | 1.09      | 24.90    | 16.94    | 47.38    | 100.44    | 50.87    | 1.13      |
| Self-report<br>having access<br>to place to<br>wash hands | Beta              | -0.01     | -0.06***  | -0.06*** | -0.07*** | -0.13*** | -0.05***  |          | 0.01      |
|                                                           | Contribution      | -0.004*** | -0.003*** | -0.01*** | -0.04*** | -0.18*** | -0.03***  |          | 0.003***  |
|                                                           | Contribution<br>% | 11.40     | 2.14      | 9.50     | 15.10    | 35.34    | 10.13     |          | -0.74     |
| Urban vs.<br>(rural)                                      | Beta              |           | -0.04***  | 0.02     | 0.02     | 0.02     | -0.02     | -0.04*** | -0.01     |
|                                                           | Contribution      |           | -0.03***  | 0.03***  | 0.01***  | 0.01***  | -0.02***  | -0.06*** | -0.005*** |
|                                                           | Contribution<br>% |           | 21.04     | -24.55   | -6.22    | -2.32    | 5.35      | 15.60    | 1.21      |

---

\*\*\* p<0.01, \*\* p<0.05, \* p<0.1
